JANUARY 2020 | VOLUME 177 | NUMBER 1

# The American Journal of Psychiatry

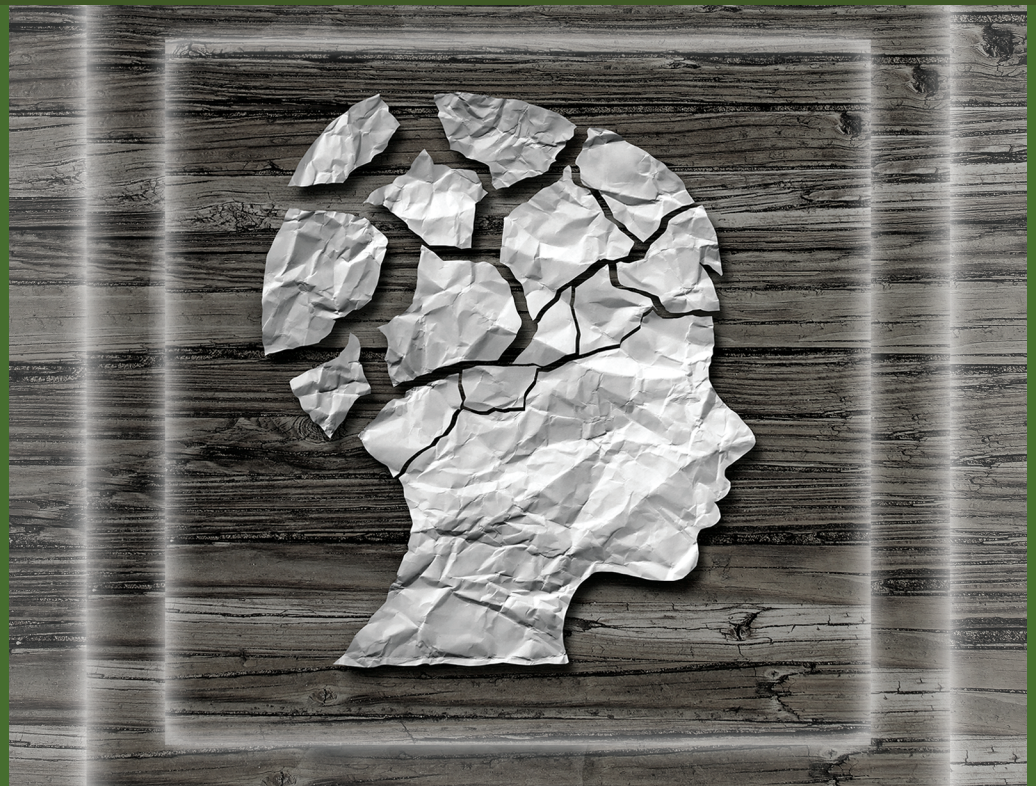

Early-Life Environmental Factors Impacting the  
Development of Psychopathology

The Devastating Clinical Consequences of Child Abuse and Neglect

Association of Childhood Maltreatment With Interpersonal  
Distance and Social Touch Preferences in Adulthood

Adverse Childhood Experiences: Implications for Offspring  
Telomere Length and Psychopathology

AMERICAN  
PSYCHIATRIC  
ASSOCIATION

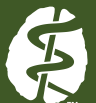

[ajp.psychiatryonline.org](http://ajp.psychiatryonline.org)
